# Supplementary material for: NH4 + protects tomato plants against Pseudomonas syringae by activation of systemic acquired acclimation
Source: PubMed Central journal article supplement (PMC4623687; doi:10.1093/jxb/erv382), 2015-08-05

**NH<sub>4</sub><sup>+</sup> protects tomato plants against *Pseudomonas syringae* by activation of systemic acquired acclimation**

Emma Fernández-Crespo, Loredana Scalschi, Eugenio Llorens , Pilar García-Agustín, and Gemma Camañes

*Supplemental Files*

**Table S1.** Primers sequences

| <b>Gene</b>                   | <b>GenBank<br/>accession number</b> | <b>Tm</b> | <b>Primers</b>                                                            |
|-------------------------------|-------------------------------------|-----------|---------------------------------------------------------------------------|
| <i>EF1<math>\alpha</math></i> | NM_001247106.1                      | 60        | Fwd: 5'-GACAGGCGTTCAGGTAAGGA-3'<br>Rev: 5'-GGGTATTCAGCAAAGGTCTC-3'        |
| <i>PR1</i>                    | EU589238.1                          | 54        | Fwd: 5'-CCGTGCAATTGTGGGTGTC-3'<br>Rev: 5'-GAGTTGCGCCAGACTACTTGAGT-3'      |
| <i>PR5</i>                    | AY257487.1                          | 58        | Fwd: 5'-GAGGTTTCATGCCAAACTGGTC-3'<br>Rev: 5'-TCAACCAAAGAAATGTCC-3'        |
| <i>LoxD</i>                   | U37840.1                            | 58        | Fwd: 5'-GGCTTGCTTTACTCCTGGTC-3'<br>Rev: 5'-AAATCAAAGCGCCAGTTCTT-3'        |
| <i>ACCox</i>                  | NP_001233928.1                      | 54        | Fwd: 5'-CCATGTCCTAAGCCCGATTTGAT-3'<br>Rev: 5'-TCACTTT GTCATCTTGGAACAGA-3' |
| <i>JMT</i>                    | Scalschi et al.,<br>2013            | 55        | Fwd: 5'-GGTTCAAAGTGCATGAGAGCT-3'<br>Rev: 5'-TACACCACACACTGAAGGAAA-3'      |
| <i>Asr1</i>                   | NM_001247703.1                      | 54        | Fwd: 5'-ACACCACCACCACCTGT-3'<br>Rev: 5'-GTGTTTGTGTGCATGTTGTGGA-3'         |
| <i>rboh1</i>                  | AF148534.1                          | 60        | Fwd: 5'-AAGCCGGAACCTTGAGTCAGA-3'<br>Rev: 5'-GTCTCAGCAGCACCCCTTAGC-3'      |
| <i>CuAO</i>                   | AJ871578.1                          | 52        | Fwd: 5'-ATATCCCAGGTCATGTTTGA-3'<br>Rev: 5'-TCCATCAGGTGCCACAAATA-3'        |

**Fig.S1. PAs content in control and N-NH<sub>4</sub><sup>+</sup> tomato plants in *Pst* infection.** Four-week-old tomato plants were grown in control conditions or in 5 mM of NH<sub>4</sub><sup>+</sup> and were inoculated by dipping them in a bacterial suspension of *Pst* at 5 × 10<sup>5</sup> c.f.u. mL<sup>-1</sup>. Leaves were collected at various time points and spermidine (A) and spermine (B) levels were determined in freeze-dried material by HPLC–MS. Data show the average of three independent experiments of a pool of 10 plants per experiment ± SE. Letters indicate statistically significant differences (p < 0.05; least-significant difference test).

**Fig.S2. Effect of NH<sub>4</sub><sup>+</sup> treatment on tomato plants infected with *B. cinerea*.** Four-week-old tomato plants were grown in control conditions or in 5 mM of NH<sub>4</sub><sup>+</sup> and lesion diameter was measured after 72 h of inoculation. The data show the lesion diameter (mm) ± standard error (SE) (n = 20)

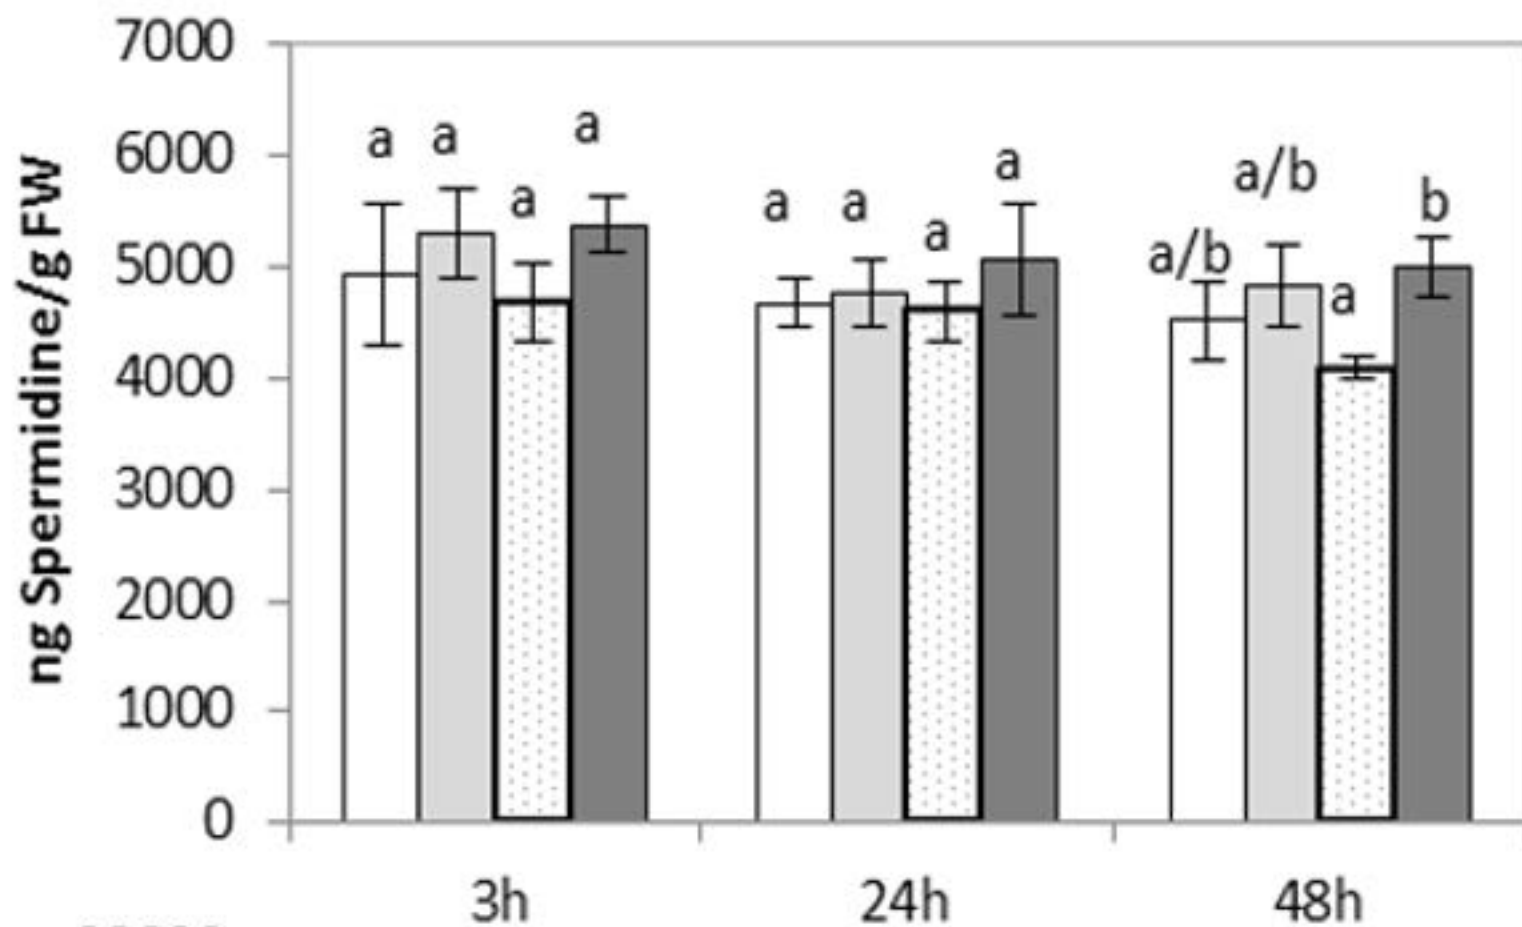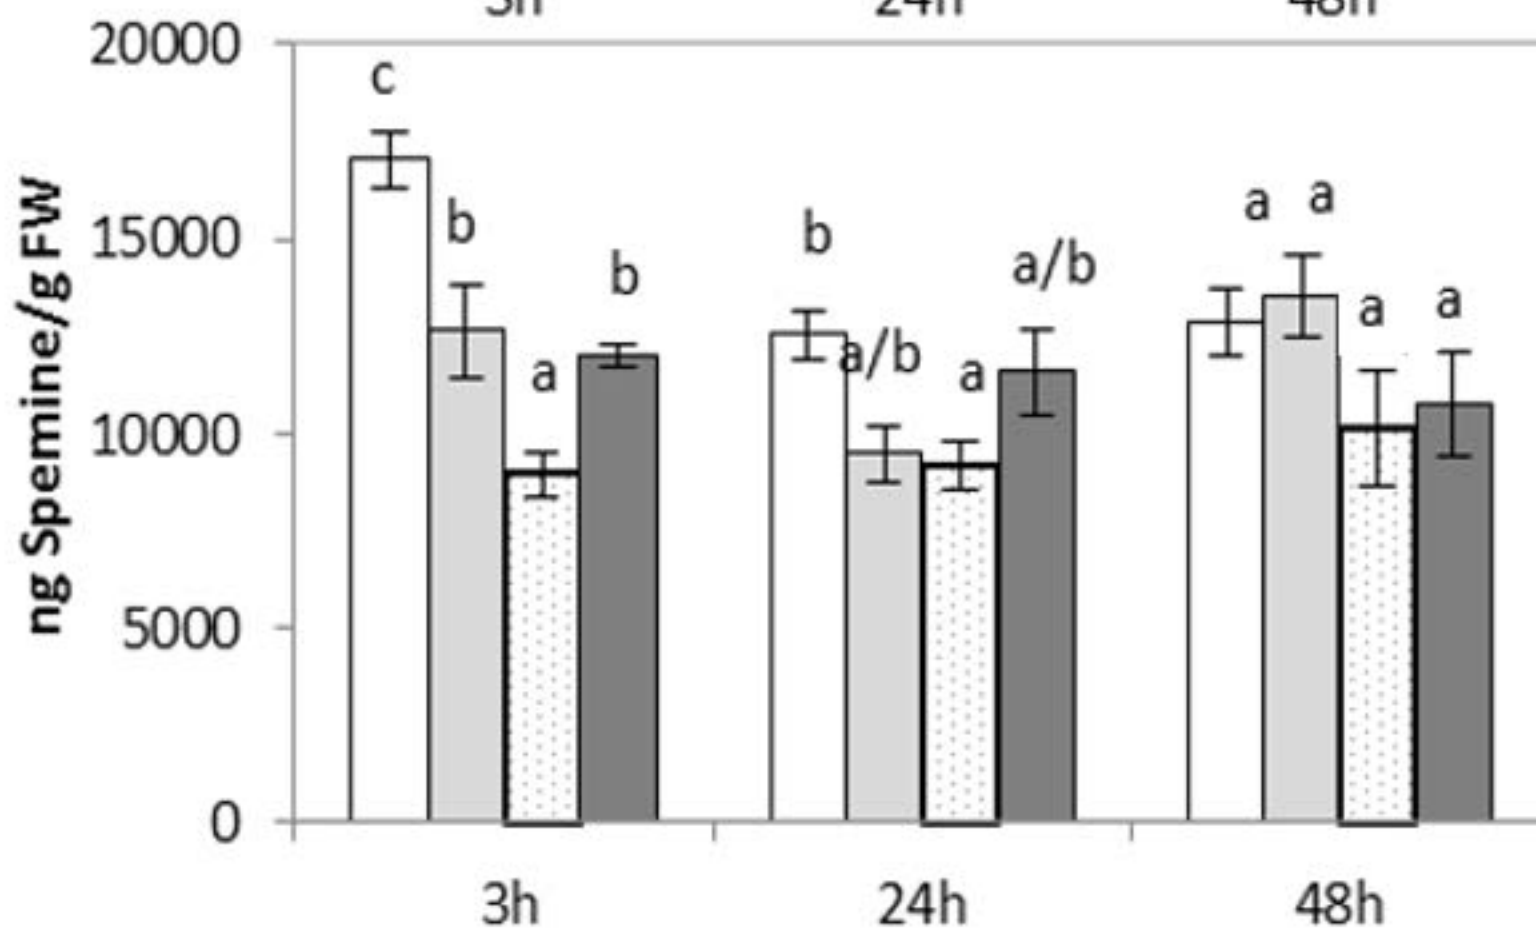

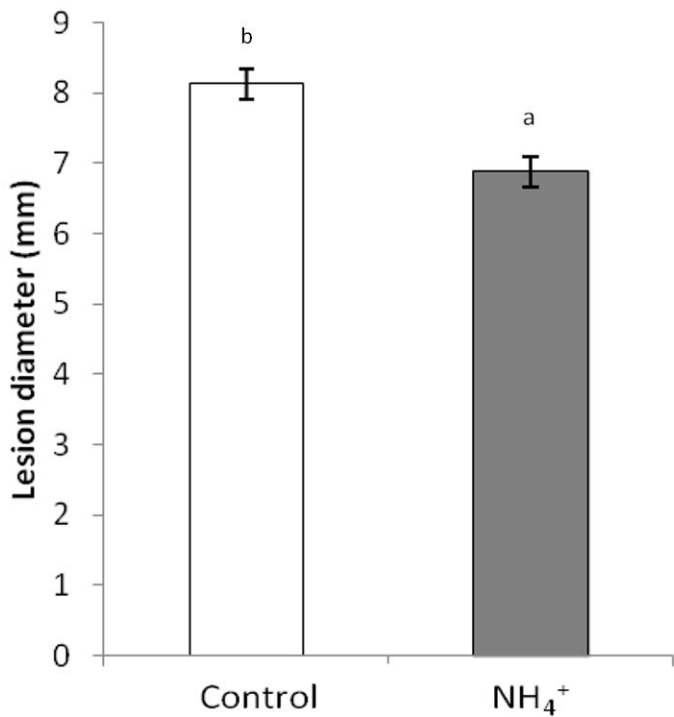

Supplement: supp_erv382_jexbot150151_file001.pdf [file supp_erv382_jexbot150151_file001.pdf]
